1 **Title:** Peripheral and Cerebral Vascular Reactivity in Black and White Women: Examining the  
2 Impact of Psychosocial Stress Exposure Versus Internalization and Coping

3

4 **Running Title:** Vascular Function, Stress, and Coping in Black and White Women

5

6 **Authors:** Zachary T. Martin, Iman O. Al-daas, Natalia Cardenas, John O. Kolade, Emily R.  
7 Merlau, Joshua K. Vu, Kyrah K. Brown, & R. Matthew Brothers

8

9 **Authors' affiliation:** Department of Kinesiology, The University of Texas at Arlington, Arlington,  
10 TX, USA

11

12 **Corresponding author:** R. Matthew Brothers, [matthew.brothers@uta.edu](mailto:matthew.brothers@uta.edu)

13 ORCID: 0000-0002-3281-5277

14

15 R. Matthew Brothers, PhD

16 Department of Kinesiology

17 College of Nursing and Health Innovation

18 University of Texas at Arlington

19 500 W. Nedderman, MAC 147

20 Arlington, TX 76019 USA

21 Tel: (817) 272-3156

22

23

24

25

26

27

28

29

30

31

32  
33  
34  
35  
36  
37  
38  
39  
40  
41  
42  
43  
44  
45  
46  
47  
48  
49  
50  
51  
52  
53  
54  
55  
56  
57  
58  
59  
60  
61  
62  
63  
64  
65

### Abstract

Black women have the highest rates of cardiovascular and cerebrovascular disease prevalence and mortality in part due to blunted vascular function. Psychosocial stress likely also contributes but its relationship to vascular function remains incompletely understood. Recent studies suggest that internalization and coping strategies are more important than stress exposure alone. We hypothesized that Black women have blunted peripheral and cerebral vascular function and that, among Black women, this would be inversely related with psychosocial stress internalization/coping but not stress exposures. Healthy Black ( $n = 21$ ;  $20 \pm 2$  yr) and White ( $n = 16$ ;  $25 \pm 7$  yr) women underwent testing for forearm reactive hyperemia (RH), brachial artery flow-mediated dilation (FMD), and cerebrovascular reactivity (CVR). Psychosocial stress exposure (adverse childhood experiences, ACEs; past week discrimination, PWD) and internalization/coping techniques (John Henryism Active Coping Scale, JHAC12; Giscombe Superwoman Schema Questionnaire, G-SWS-Q) were assessed. RH and CVR ( $p > 0.05$ ) were not different between groups whereas FMD was lower in Black women ( $p = 0.007$ ). Neither ACEs nor PWD were associated with FMD in either group ( $p > 0.05$  for all). JHAC12 scores were negatively associated with FMD in Black women ( $p = 0.014$ ) but positively associated with FMD in White women ( $p = 0.042$ ). SWS-Succeed was negatively associated ( $p = 0.044$ ) and SWS-Vulnerable tended to be negatively associated ( $p = 0.057$ ) with FMD in Black women. These findings indicate that blunted FMD in Black women may be due more to internalization and maladaptive coping than stress exposure alone.

Keywords: health disparity; African American women; cardiovascular disease; social determinants of health; racism

66  
67  
68  
69  
70  
71  
72  
73  
74  
75  
76  
77  
78  
79  
80  
81  
82  
83  
84  
85  
86  
87  
88  
89  
90  
91  
92  
93  
94  
95  
96  
97  
98  
99

## Introduction

Among women in the United States, Black women suffer from the highest rates of hypertension, coronary artery disease, stroke, and total cardiovascular disease (CVD) mortality (1). Importantly, peripheral and cerebral vascular dysfunction precede overt CVD and are predictive of CVD risk and mortality (2-6). We and others have reported blunted peripheral and cerebral vascular function in Black men and women (7-14). However, this is not always a consistent finding (7, 15) and, alarmingly, Black women are underrepresented in this literature despite have similarly high rates of disease risk/prevalence as Black men (1). Furthermore, although these investigations have been critical for identifying race/ethnicity-related disparities in vascular function, more work is needed to better understand the influence of upstream factors, such as social determinants of health (SDOH), on cardiovascular health and subsequent disease risk in Black women (16).

SDOH range from access to quality healthcare and education to employment opportunities and living in a safe environment (16). In the United States, structural racism (e.g., policies that systematically disenfranchise racial/ethnic minoritized groups) has put many Black Americans at a social disadvantage (16), which ultimately has numerous negative impacts on all aspects of life, including cardiovascular health (16). Indeed, Black Americans are more likely to experience adverse childhood experiences (17) as well as interpersonal racism (18, 19). Accordingly, constant psychological stress from adverse social conditions causes biological responses (i.e., allostasis), which, over time, cause neurohormonal imbalances, including augmented systemic inflammation and oxidative stress (i.e., allostatic overload) (20, 21). These alterations can subsequently impair vascular responsiveness/health (22, 23); however, the precise psychophysiological pathways and mechanisms remain incompletely understood (16). Interestingly, a growing literature suggests that internalization of stressful events and stress coping techniques (e.g., Superwoman Schema or John Henryism (24, 25)) may be more important to cardiovascular health and function than exposure to psychosocial stressors alone (26-29). Therefore, we investigated the relationship between vascular function and psychosocial stress exposure versus internalization and coping. We hypothesized that 1) peripheral and cerebral vascular function would be blunted in Black relative to White women and 2) among Black women, internalization and maladaptive coping would exhibit a stronger negative relationship with vascular function than exposure to stressful experiences alone.

## 100 **Materials and Methods**

### 101 **Ethical Approval**

102 Ethical approval was obtained from the University of Texas at Arlington Institutional  
103 Review Board (#2021-0270 and #2022-0541). All participants were informed of the experimental  
104 procedures and risks before participating. Verbal and written informed consent was obtained  
105 from each participant. The experimental protocols aligned with the guidelines set forth by the  
106 Declaration of Helsinki except for registration in a database.

### 107 108 **Participants**

109 Thirty-eight Black ( $n = 21$ ) and White ( $n = 17$ ) women were recruited from the Dallas-Fort  
110 Worth Metroplex via flyers, social media, and word-of-mouth from 2021 through 2023.  
111 Participants were included if they self-reported being of Black or White race/ethnicity, women,  
112 and age 18-40 yr. Participants were excluded if they reported a history of smoking within 2  
113 years or being a current smoker; taking vasoactive medications; or having overt cardiovascular,  
114 metabolic, or neurological disease. All data from one White participant were excluded due to  
115 persistent COVID-19 symptoms, which have been reported to have negative vascular effects  
116 (30), leaving a total of 37 participants ( $n = 21$  Black women and  $n = 16$  White women).

### 117 118 **Study Design and Protocol**

119 During a single visit to the laboratory, participants completed a routine venous blood  
120 draw, social determinants of health questionnaires, and peripheral and cerebral vascular  
121 function testing. Testing occurred following a minimum 8 hr fast, at least an 8 hr abstention from  
122 caffeine and medications/supplements, and at least a 24 hr abstention from alcohol and  
123 vigorous exercise.

### 124 125 **Measurements**

#### 126 ***Initial Measurements***

127 After participants provided informed consent and completed the health history  
128 questionnaire, height and weight were measured using a stadiometer and scale (Seca 769;  
129 Seca North America; Chino, CA, USA). Body composition was further assessed as the waist-to-  
130 hip ratio following standard guidelines (31).

#### 131 132 ***Venous Blood Draw***

133 A fasting venous blood sample was taken to assess glucose, lipid, estradiol, and  
134 progesterone concentrations along with HbA1c (Labcorp; Burlington, NC, USA). To assess  
135 circulating concentrations of C-reactive protein (CRP), a marker of inflammation, blood was  
136 collected in a serum separator tube, centrifuged, and analyzed via an  
137 immunochemiluminometric assay for CRP (Labcorp; Burlington, NC, USA).

138

### 139 **Questionnaires**

140 **Participant Characteristics.** To assess each participant's self-reported physical activity  
141 habits, the International Physical Activity Questionnaire (IPAQ) (32) was administered. Due to  
142 the relatively young age of both cohorts, we assessed an index of childhood socioeconomic  
143 status by asking participants about the highest level of education achieved by their mother and  
144 father (33, 34). Seven educational categories were provided, ranging from "Less than high  
145 school" to "Master's degree/terminal professional degree," and assigned a value from 1-7,  
146 respectively (24, 34).

147

148 **Psychosocial Stress Exposure.** We used two validated questionnaires to assess  
149 exposure to psychosocial stress. To assess early life adversity, which is associated with  
150 decrements in mental and physical health across the lifespan (35, 36), we administered the  
151 Adverse Childhood Experiences (ACEs) questionnaire (37). ACEs (0-10 experiences) were  
152 summed to provide an overall ACEs score. In order to assess an index of short-term  
153 psychosocial stress, we administered the Past Week Discrimination (PWD) questionnaire, a ten-  
154 item survey inquiring about the frequency (0-3+) of race/ethnicity-related experiences of  
155 discrimination during the past 7 days (38). The number of exposures to experiences of  
156 discrimination were then summed, yielding an overall PWD score ranging from 0-30, with higher  
157 values representing a greater degree of stress exposure.

158

159 **Psychosocial Stress Internalization and Coping.** High effort coping with life's  
160 obstacles in the face of limited resources was measured via the John Henryism Active Coping  
161 Scale (JHAC12), a 12-item questionnaire that asks the participant to state the extent (from  
162 completely false to completely true) to which statements such as "I don't let my personal  
163 feelings get in the way of doing a job" are true for them (39). Responses were coded 1-5,  
164 respectively, and summed, thereby providing an overall JHAC12 score (39). Woods-Giscombe,  
165 et al. developed the Giscombe Superwoman Schema Questionnaire (G-SWS-Q), which  
166 operationalizes the Superwoman Schema (SWS) Conceptual Framework to quantify

167 psychological stress processes specifically associated with being a Black woman (24, 40).  
168 Therefore, to measure stress coping strategies and SWS internalization, Black participants  
169 completed the G-SWS-Q, which is a 35-item instrument designed to measure the cognitive,  
170 affective, and behavioral underpinnings associated with being a Strong Black Woman in the  
171 United States (24, 40). Responses were scored according to the developer's instructions, and  
172 provided an overall SWS score as well as scores for 5 subscales: 1) Obligation to present an  
173 image of strength; 2) Obligation to suppress emotions; 3) Resistance to being vulnerable; 4)  
174 Intense motivation to succeed; and 5) Obligation to help others (24). Higher scores indicated  
175 greater endorsement of the various SWS constructs.

176

### 177 ***Brachial Artery Flow-Mediated Dilation & Forearm Reactive Hyperemia***

178 Following 15 min of supine rest, measures of microvascular and macrovascular function  
179 were performed as previously described (41) and in accordance with the latest evidence-based  
180 recommendations (42). Briefly, the right arm was abducted and supported at heart level while a  
181 pneumatic cuff was wrapped around the forearm ~1 cm distal to the antecubital fossa. The  
182 brachial artery was insonated ~5-10 cm proximal to the antecubital fossa via an adjustable  
183 frequency (10-13 MHz) linear array Doppler ultrasound probe (LOGIQ P5; GE Healthcare;  
184 Chicago, IL, USA), held in place by a stereotactic probe holder at an angle of 60°. B-mode  
185 images of the brachial artery were optimized to ensure delineation between the vessel wall and  
186 lumen during offline analysis. The probe was then set to duplex mode (pulsed frequency of 5  
187 MHz) for simultaneous imaging of the artery and blood velocity, with the sample volume set to  
188 include the entire artery without extending beyond its wall. Brachial artery diameter ( $D$ ; cm) and  
189 blood velocity ( $V_{\text{blood}}$ ; cm/s) were continuously recorded throughout a 2 min baseline period,  
190 after which the cuff was inflated to 220 mmHg to occlude circulation to the forearm for 5 min  
191 (Rapid Cuff Inflation System; D. E. Hokanson, Inc.; Bellevue, WA, USA). Upon cuff release,  $D$   
192 and  $V_{\text{blood}}$  were recorded for a 3 min recovery period. Digital video of the entire protocol was  
193 recorded and saved (Elgato/CORSAIR; Fremont, CA, USA) for later analysis using a  
194 commercially available edge-detection and velocity tracking software (FMD Studio; Quipu; Pisa,  
195 Italy). Brachial artery flow-mediated dilation (%FMD) was defined as  $((D_{\text{peak}} - D_{\text{baseline}}) /$   
196  $D_{\text{baseline}}) \times 100$ . Angle-corrected  $V_{\text{blood}}$  was calculated as the full area of the Doppler envelope  
197 each second and averaged between antegrade and retrograde velocity ( $V_{\text{mean}}$ ). Reactive  
198 hyperemia (RH) was calculated as the peak as well as the relative (absolute  $\Delta$  and percentage)  
199 increase in blood velocity following cuff release. Shear rate, as  $\text{s}^{-1}$ , was calculated as  $4 \times$

200  $V_{\text{mean}}/D$  and shear rate AUC was calculated as the sum of the second-by-second shear rate  
201 above baseline up to  $D_{\text{peak}}$ .

202  
203  
204

### 205 **Cerebral Vascular Function**

206 Cerebral vascular function was assessed as the cerebral vasodilatory reactivity to  
207 steady-state hypercapnia as previously described in detail by our lab and others (6, 43-45).  
208 While supine, heart rate was monitored via ECG (CardioCard; Nasiff Associates; Central  
209 Square, NY, USA) and brachial artery blood pressure was measured via an oscillometric  
210 electrophygmomanometer (Tango M2; SunTech Medical; Morrisville, NC, USA). The partial  
211 pressure of end-tidal  $\text{CO}_2$  ( $P_{\text{ETCO}_2}$ ) and peripheral oxygen saturation ( $\text{SpO}_2$ ) (Capnostream®  
212 Plus; BCI/Smiths Medical; Minneapolis, MN, USA) along with respiratory rate (Pneumotrace II;  
213 UFI; Morro Bay, CA, USA) were also continuously measured. Continuous beat-to-beat blood  
214 pressure was monitored via finger photoplethysmography (Finometer PRO; Finapres Medical  
215 Systems; Enschede, Netherlands). Left middle cerebral artery blood velocity (MCAv) was  
216 measured using a 2 MHz probe (TOC Neurovision; Multigon Industries; Yonkers, NY, USA)  
217 fixed at the temporal window with a headband. The participants were then fitted with a  
218 mouthpiece and 3-way stopcock valve (Hans Rudolph, Inc.; Shawnee, KS, USA) that led to  
219 either ambient air or a 5 L rubber bag (GPC Medical Ltd.; New Delhi, Delhi, India) pre-filled with  
220 a 6%  $\text{CO}_2$  gas mixture (21%  $\text{O}_2$ , nitrogen balance). Baseline data were collected for 3 min while  
221 the participant breathed ambient air, after which the valve was switched so that the participant  
222 began breathing air from the bag, which was continuously supplied with 6%  $\text{CO}_2$ . Following 3  
223 min of steady-state hypercapnia, the valve was switched back to ambient air and data collection  
224 continued for a 3 min recovery period. Data from the last minute of baseline and the last minute  
225 of hypercapnia were selected and used in the analysis. Cerebrovascular conductance index  
226 (CVCi) was calculated as  $CVCi = MCAv/MAP$ , and cerebrovascular reactivity was assessed as  
227  $\Delta MCAv/\Delta PETCO_2$ ,  $\Delta CVCi/\Delta PETCO_2$ , and  $\%CVCi/\Delta PETCO_2$ .

228

### 229 **Statistical Analysis**

230 All data were processed using GraphPad Prism 9 (v. 9.4.0; GraphPad Software, LLC;  
231 San Diego, CA, USA) and SAS 9 (v. 9.4; SAS Institute; Cary, North Carolina, USA). The data  
232 were assessed for normality via the D'Agostino-Pearson normality test. Group comparisons of  
233 participant characteristics and outcomes were evaluated via Welch's  $t$ -test, the Mann-Whitney  $U$



234 test, and ANCOVA. Preliminary analyses revealed that 1) brachial artery FMD was the only  
235 vascular outcome indicating differences between groups and 2) there were no discernible  
236 relationships between psychosocial stress outcomes and vascular outcomes when collapsing  
237 the groups. Therefore, we performed Spearman correlation analyses between the psychosocial  
238 stress variables and brachial artery %FMD in Black and White women separately. RH, FMD,  
239 and CVR data from two Black women and one White woman were deemed statistical outliers  
240 via Grubbs' test and excluded from the analysis. All data are presented as mean  $\pm$  SD or  
241 individually along with the group mean, and the level for statistical significance was set *a priori*  
242 at  $\alpha = 0.05$ .

243  
244  
245  
246  
247  
248  
249  
250  
251  
252  
253  
254  
255  
256  
257  
258  
259  
260  
261  
262  
263  
264  
265  
266  
267



268  
269  
270  
271  
272  
273  
274  
275  
276  
277  
278  
279  
280  
281  
282  
283  
284  
285  
286  
287  
288  
289  
290  
291  
292  
293  
294  
295  
296  
297  
298  
299  
300  
301

## Results

### Participant Characteristics

Participant characteristics are provided in Table 1. There were no differences between groups in BMI, waist-to-hip ratio, resting heart rate and blood pressure, physical activity and sedentary levels, nor childhood socioeconomic status as indexed by parental education level ( $p > 0.05$  for all). However, Black women were younger than White women ( $p = 0.035$ ).

### Venous Blood Sample

A summary of the venous blood test results is provided in Table 2. There were no differences between groups in Total-C, HDL-C, LDL-C, progesterone, or CRP ( $p > 0.05$  for all). However, Black women had lower blood glucose ( $p = 0.013$ ) but higher HbA1c ( $p < 0.001$ ) relative to White women, although the average values for both groups fell within normal healthy ranges. Triglycerides and VLDL-C were higher in the White women ( $p = 0.005$  and  $p = 0.004$ , respectively), but the average values for both groups fell within normal healthy ranges. At the time of testing, serum estradiol was higher in Black women ( $p = 0.043$ ), despite no difference between groups in the number of days into the menstrual cycle ( $p = 0.391$ ; Table 1).

### Psychosocial Stress

A summary of the psychosocial stress measures is provided in Table 3. There were no differences between groups in adverse childhood experiences or John Henryism endorsement ( $p > 0.05$  for both). However, Black women reported greater past week racial/ethnic discrimination ( $p = 0.022$ ). Overall SWS endorsement as well as SWS subscale scores for Black women only are provided in Table 3.

### Forearm Reactive Hyperemia & Brachial Artery Flow-Mediated Dilation

There were no differences between groups in resting brachial artery blood velocity nor peak blood velocity, absolute change in blood velocity, or percentage change in blood velocity following forearm cuff release ( $p > 0.05$  for all; Fig. 1A-D, respectively).

302 Baseline brachial artery diameter and shear rate AUC to peak diameter following cuff  
303 release were not different between groups ( $p > 0.05$  for both; Fig. 1E and Fig. 1H, respectively).  
304 Whether expressed as absolute change (Fig. 1F) or percentage change (Fig. 1G) in blood  
305 vessel diameter, brachial artery flow-mediated dilation was blunted in Black relative to White  
306 women ( $p = 0.006$  and  $p = 0.007$ , respectively), and these results were unaffected when  
307 entering shear rate AUC to peak diameter as a covariate in ANCOVA.

### 308 **Hypercapnic Cerebrovascular Reactivity**

309 Whether expressed as  $\Delta\text{MCAv}/\Delta\text{PETCO}_2$ ,  $\Delta\text{CVCi}/\Delta\text{PETCO}_2$ , or  $\%\text{CVCi}/\Delta\text{PETCO}_2$ , no  
310 significant differences between groups were detected in cerebral vascular reactivity to steady-  
311 state hypercapnia ( $p > 0.05$  for all; Fig. 2 A-C, respectively).

312

### 313 **Psychosocial Stress Exposure or Internalization/Coping and FMD**

314 There was no relationship between past week discrimination nor adverse childhood  
315 experiences and brachial artery FMD in Black ( $p > 0.05$  for both; Fig. 3A and 3C, respectively)  
316 or White ( $p > 0.05$  for both; Fig. 3B and 3D, respectively) women. There was no discernable  
317 relationship between Overall SWS (Fig. 4A), SWS-Obligation to Present an Image of Strength  
318 (Fig. 4B), SWS-Obligation to Suppress Emotions (Fig. 4D), or SWS-Obligation to Help Others  
319 (Fig. 4F) and brachial artery FMD ( $p > 0.05$  for all). However, SWS-Intense Motivation to  
320 Succeed (Fig. 4C) was and SWS-Resistance to Being Vulnerable (Fig. 4E) tended to be  
321 negatively correlated with brachial artery FMD ( $r_s = -0.40$ ,  $p = 0.044$  and  $r_s = -0.37$ ,  $p = 0.057$ ,  
322 respectively). In Black women, there was a moderate correlation between John Henryism  
323 endorsement and brachial artery FMD ( $r_s = -0.50$ ,  $p = 0.014$ ; Fig. 5A). However, in White  
324 women, John Henryism endorsement was positively associated with brachial artery FMD ( $r_s =$   
325  $0.53$ ,  $p = 0.042$ ; Fig. 5B).

326

327

328

329

330

331

332

333

334

335

336  
337  
338  
339  
340  
341  
342  
343  
344  
345  
346  
347  
348  
349  
350  
351  
352  
353  
354  
355  
356  
357  
358  
359  
360

## Discussion

The primary findings are that 1) brachial artery (macrovascular) endothelial function but not forearm microvascular nor cerebral vascular function is blunted in young, Black relative to White women and 2) among Black women, there are stronger relationships between indices of psychosocial stress internalization/coping techniques and brachial artery FMD than psychosocial stress exposures alone and FMD. To our knowledge, this is the first study to investigate the relationship between various indices of psychosocial stress exposure and internalization/coping techniques and novel indices of peripheral and cerebral vascular function in Black women, a population that faces heightened CVD and stroke risk. Importantly, the National Institutes of Health and the Center for Disease Control and Prevention have substantially increased efforts to address social determinants of health and structural racism (46, 47). Additionally, a recent Presidential Advisory from the American Heart Association called for accelerated research into the joint effects of multiple domains of racism on health (48). Accordingly, by investigating the potential influence of psychosocial stress exposure and internalization/coping techniques on indices of peripheral and cerebral vascular function, the present study provides new knowledge regarding the relationship between interpersonal racism and cardiovascular health.

### Brachial Artery Flow-Mediated Dilation

Brachial artery FMD testing is a common approach for assessing endothelial function (49) and is predictive of CVD morbidity and mortality (2-5). Here, we demonstrated that young, otherwise healthy Black women have blunted brachial artery endothelial function. Few studies have investigated differences by race/ethnicity in conduit artery endothelial function in this manner. However, our data are consistent with and extend the findings of those from the available studies by Campia et al. (12), Perregaux et al. (50), and D'Agata et al. (7), which all demonstrate blunted FMD in Black relative to White women. Although our approach was generally similar to those studies, there are some differences to consider. Campia et al. (12)

370 studied an older (~40 yr) cohort whereas our participants were ~20-25 yr; therefore, the present  
371 findings provide new data in a younger population. Additionally, the current data are somewhat  
372 conflicting with the conclusions of the study from D'Agata et al. (7) who reported blunted  
373 brachial artery FMD in a cohort of Black women (7). However, in their study, differences were  
374 abolished after normalizing the raw FMD values to shear rate AUC (7), leading them to  
375 conclude that peripheral macrovascular function was preserved in Black relative to White  
376 women. We, however, accounted for shear rate AUC by reporting/examining it (and found no  
377 differences) as is recommended by the current guidelines for FMD testing (42). Accordingly, our  
378 data provide new evidence that brachial artery FMD is blunted in young, otherwise health Black  
379 women. Potential mechanisms for this disparity in vascular endothelial function are discussed  
380 below.

381

### 382 **Forearm Reactive Hyperemia**

383 Post-occlusive RH testing is commonly utilized to assess microvascular function (51),  
384 and blunted responses are predictive of future CVD risk (2). In the present study, there were no  
385 differences in forearm reactive hyperemia between Black and White women. This finding is  
386 contrary to the conclusions of the study by D'Agata et al. (7), where they indicated that forearm  
387 microvascular function was blunted in Black women. However, this conclusion was based on  
388 RH indexed as total flow AUC, which is confounded by changes in brachial artery diameter over  
389 the course of the recovery period. Consistent with our data, D'Agata et al. (7) reported no  
390 differences between Black and White women in peak hyperemia, which appears to be a better  
391 indicator of truly “reactive” hyperemia as opposed to “responsive” hyperemia, as proposed by  
392 Rosenberry & Nelson (51). Some (52, 53) but not all (12, 50) studies investigating differences in  
393 reactive hyperemia by race/ethnicity have demonstrated that Black individuals have blunted  
394 microvascular function (52, 53). Although performed in a middle-aged cohort, the study by  
395 Morris et al. (53) was designed to investigate race x sex differences and indicated that there  
396 were no differences between Black and White women, while the study by Ranadive et al. (52)  
397 was not designed to investigate race x sex differences. Therefore, our finding of preserved  
398 reactive hyperemia, as indexed by peak hyperemia, in Black relative to White women is  
399 consistent with that of D'Agata et al. (7) and Morris et al. (53); however larger investigations are  
400 needed to completely understand whether there are differences in forearm microvascular  
401 function by race/ethnicity, particularly in young, otherwise health Black and White women

402

### 403 **Hypercapnic Cerebrovascular Reactivity**

404 Cerebral vascular reactivity serves as an index of cerebral vascular function/health and  
405 is predictive of all-cause, cardiovascular, and non-cardiovascular mortality (6, 54). To our  
406 knowledge, this is the first study to specifically investigate cerebral vascular reactivity to  
407 hypercapnia in young Black and White women. We demonstrated that there were no differences  
408 between groups regardless of the metric used to express CVR. Previous data from our lab  
409 indicate that young, Black men and women have blunted hypercapnic CVR (10, 14); however,  
410 these studies were not designed to investigate race x sex differences. Accordingly, the  
411 previously observed race/ethnicity-related differences in CVR may be primarily driven by  
412 blunted CVR in Black men. In support of this, Akins et al. (55) recently demonstrated that CVR  
413 was significantly blunted in Black men relative to Black women. There are numerous  
414 possibilities to explain these potential race x sex differences in CVR. Given that all the women  
415 participants in the studies (10, 14, 55) from our lab are premenopausal, the cerebral vasculature  
416 in Black women may be protected in part by estrogen, which appears to preserve cerebral  
417 vascular function (56, 57). More longitudinal work that leverages the SDOH framework (16) is  
418 needed to better understand how Black women transition from preserved CVR in young  
419 adulthood to having a twofold higher stroke prevalence relative to White women (1).

420

#### 421 **Psychosocial Stress Exposure or Internalization/Coping and FMD**

422 Given that Black women exhibited blunted conduit artery endothelial function in the  
423 present study, we investigated whether there were differential relationships between brachial  
424 artery FMD and psychosocial stress exposure vs. internalization/coping. We found that there  
425 was no discernible relationship between psychosocial stress exposure, as indexed by past week  
426 discrimination and adverse childhood experiences, and FMD among Black or White women.  
427 However, among Black women, the relationship between FMD and endorsement of Overall  
428 SWS as well as the SWS subscales varied from no relation to weak-to-moderate. The  
429 subscales that either were correlated with or tended to correlate with FMD were SWS-Intense  
430 Motivation to Succeed and SWS-Resistance to Being Vulnerable respectively. In comparison,  
431 John Henryism endorsement exhibited a moderate inverse relationship with FMD among Black  
432 women while, interestingly, a moderate positive relationship between John Henryism  
433 endorsement and FMD was observed in White women. Taken together, these data indicate that  
434 psychosocial stress exposure alone is not related to brachial artery endothelial function in  
435 young, Black or White women. However, depending on the metric used, psychosocial stress  
436 internalization/coping techniques may exhibit a moderate inverse relationship with brachial  
437 artery endothelial function in Black women. Although the finding of a positive relationship

438 between John Henryism and FMD in White women was not anticipated, this is not  
439 unprecedented (58), and it is possible that John Henryism is associated with health-promoting  
440 behaviors in some groups. For example, Bild et al. (59) demonstrated that John Henryism was  
441 positively associated with higher physical activity among White women (59), which itself has  
442 numerous positive effects on cardiovascular health/function (60). Nevertheless, these data set  
443 the stage for more comprehensive investigations aiming to better understand relationships  
444 between various domains of psychosocial stress and cardiovascular health and function,  
445 particularly in Black women. In general, the literature suggests that psychosocial stress  
446 exposure is predictive of cardiovascular health (61); however, the additive power of  
447 internalization and coping techniques, within a broader context of structural racism, is immense  
448 (26-29). Therefore, in our relatively young cohort of Black women, it appears that one's coping  
449 techniques may have a greater contribution to alterations in endothelial function than exposure  
450 to psychosocial stressors alone. Research regarding the mechanisms that link psychosocial  
451 stress exposure and internalization/coping to cardiovascular function and outcomes is an area  
452 of heavy interest (29, 58, 62-64). Although numerous theories and hypotheses have been  
453 proposed and continue to be tested (21), the prevailing hypothesis is that psychosocial stress  
454 gets "under the skin" to promote numerous physiological changes (20, 65). In the short term,  
455 such changes (i.e., allostasis), including increased sympathetic nervous system activity and  
456 inflammation, can be protective. However, when upregulated over a sustained period, these  
457 changes are pathophysiological (i.e., allostatic overload) (20, 21). Our data generally support  
458 this hypothesis but only among Black women; however, longitudinal investigations will be  
459 required to parse out the influence of time on the magnitude of the exposure- vs.  
460 internalization/coping-endothelial function relationship in this and other populations who face  
461 greater psychosocial stress.

462

### 463 **Strengths and Limitations**

464 The participants in this study had similar body composition, physical activity and  
465 sedentary levels, and resting heart rate and blood pressure (Table 1). This strengthens the  
466 interpretability of our findings by reducing the influence of confounding variables. This study was  
467 also strengthened by the assessment of a multitude of well-validated vascular health combined  
468 with various psychosocial outcomes. Few studies have performed such comprehensive vascular  
469 health assessments alongside psychosocial measures in at-risk populations.

470 Our approach of favoring complex tests of vascular function necessitated a relatively  
471 small sample size, which is a limitation of the current investigation. Accordingly, these findings

472 set the stage for larger cross-sectional and longitudinal studies. Furthermore, our sample  
473 consisted mainly of college students, particularly in the Black women group. This reduces the  
474 overall socioeconomic diversity and thus the diversity of exposure to psychosocial stressors  
475 within the cohort and therefore the findings of the present investigation may not be  
476 representative of young, Black women across the Dallas-Fort Worth metroplex let alone the  
477 United States. Despite this narrower range of socioeconomic diversity, we still observed some  
478 inverse relationships between indices of vascular health and psychosocial stress  
479 internalization/coping. Therefore, based on our current findings, it could be hypothesized that  
480 the negative effect of these psychosocial stressors would only be further amplified with a more  
481 socioeconomically diverse cohort. Future work should build on the current investigation by  
482 conducting multi-site trials that include aggressive yet sensitive recruitment strategies capable  
483 of incorporating a more representative sample as the current study may overrepresent Black  
484 women of higher seriocomic status, which is typically associated with attending college.  
485 Regarding the overall younger age of our cohorts, we intentionally studied a young, healthy  
486 population because our focus is on the prevention of CVD by identifying early, subclinical  
487 markers of future CVD risk.

488

## 489 **Conclusion**

490 To our knowledge, this is the first study to investigate peripheral and cerebral vascular  
491 function alongside novel indices of psychosocial stress exposure and internalization/coping  
492 techniques in young, Black women. Our data indicate that peripheral microvascular and cerebral  
493 vascular function are preserved in young Black women, but conduit artery endothelial function is  
494 blunted. Furthermore, we demonstrated that blunted conduit artery endothelial function  
495 exhibited a stronger relationship with psychosocial stress internalization/coping techniques  
496 relative to exposure to psychosocial stressors alone in Black women. Collectively, these findings  
497 indicate that elevated CVD risk in Black women may be partially attributable to internalization of  
498 psychosocial stressors as well as maladaptive coping techniques.

499

500

501

502

503

504

505



506  
507  
508  
509  
510  
511  
512  
513  
514  
515  
516  
517  
518  
519  
520  
521  
522  
523  
524  
525  
526  
527  
528  
529  
530  
531  
532  
533  
534  
535  
536

### **Author statements**

**Availability of data:** The raw data are available upon request.

**Competing interests:** The authors declare there are no competing interests.

**Acknowledgments:** The authors would like to thank the participants for their time and effort in this study.

**Funding:** This research was supported by start-up funds from The University of Texas at Arlington (RMB) and NIH R15 HL156128 (RMB). ZTM was supported by an American Heart Association Predoctoral Fellowship (#915133).

537

538

539

540

541

542

543

544

545

## References

- 546 1. **Tsao CW, Aday AW, Almarzooq ZI, Alonso A, Beaton AZ, Bittencourt MS, Boehme**  
547 **AK, Buxton AE, Carson AP, Commodore-Mensah Y, Elkind MSV, Evenson KR, Eze-Nliam**  
548 **C, Ferguson JF, Generoso G, Ho JE, Kalani R, Khan SS, Kissela BM, Knutson KL, Levine**  
549 **DA, Lewis TT, Liu J, Loop MS, Ma J, Mussolino ME, Navaneethan SD, Perak AM, Poudel**  
550 **R, Rezk-Hanna M, Roth GA, Schroeder EB, Shah SH, Thacker EL, VanWagner LB, Virani**  
551 **SS, Voecks JH, Wang NY, Yaffe K, and Martin SS.** Heart Disease and Stroke Statistics-2022  
552 Update: A Report From the American Heart Association. *Circulation* 145: e153-e639, 2022.
- 553 2. **Huang AL, Silver AE, Shvenke E, Schopfer DW, Jahangir E, Titas MA, Shpilman A,**  
554 **Menzoian JO, Watkins MT, Raffetto JD, Gibbons G, Woodson J, Shaw PM, Dhadly M,**  
555 **Eberhardt RT, Keaney JF, Jr., Gokce N, and Vita JA.** Predictive value of reactive hyperemia  
556 for cardiovascular events in patients with peripheral arterial disease undergoing vascular  
557 surgery. *Arterioscler Thromb Vasc Biol* 27: 2113-2119, 2007.
- 558 3. **Ras RT, Streppel MT, Draijer R, and Zock PL.** Flow-mediated dilation and  
559 cardiovascular risk prediction: a systematic review with meta-analysis. *International journal of*  
560 *cardiology* 168: 344-351, 2013.
- 561 4. **Shechter M, Matetzky S, Arad M, Feinberg MS, and Freimark D.** Vascular endothelial  
562 function predicts mortality risk in patients with advanced ischaemic chronic heart failure. *Eur J*  
563 *Heart Fail* 11: 588-593, 2009.
- 564 5. **Shechter M, Issachar A, Marai I, Koren-Morag N, Freinark D, Shahar Y, Shechter A,**  
565 **and Feinberg MS.** Long-term association of brachial artery flow-mediated vasodilation and  
566 cardiovascular events in middle-aged subjects with no apparent heart disease. *International*  
567 *journal of cardiology* 134: 52-58, 2009.
- 568 6. **Portegies ML, de Bruijn RF, Hofman A, Koudstaal PJ, and Ikram MA.** Cerebral  
569 vasomotor reactivity and risk of mortality: the Rotterdam Study. *Stroke* 45: 42-47, 2014.
- 570 7. **D'Agata MN, Hoopes EK, Berube FR, Hirt AE, and Witman MA.** Young black women  
571 demonstrate impaired microvascular but preserved macrovascular function compared to white  
572 women. *Exp Physiol* 106: 2031-2037, 2021.
- 573 8. **Brothers RM, Fadel PJ, and Keller DM.** Racial disparities in cardiovascular disease  
574 risk: mechanisms of vascular dysfunction. *Am J Physiol Heart Circ Physiol* 317: H777-h789,  
575 2019.
- 576 9. **Hurr C, Patik JC, Kim K, Christmas KM, and Brothers RM.** Tempol augments the  
577 blunted cutaneous microvascular thermal reactivity in healthy young African Americans.  
578 *Experimental physiology* 103: 343-349, 2018.

- 579 10. **Hurr C, Harrison ML, and Brothers RM.** Acute flavanol consumption improves the  
580 cerebral vasodilatory capacity in college-aged African Americans. *Experimental physiology* 100:  
581 1030-1038, 2015.
- 582 11. **Perregaux D, Chaudhuri A, Rao S, Airen A, Wilson M, Sung BH, and Dandona P.**  
583 Brachial vascular reactivity in blacks. *Hypertension* 36: 866-871, 2000.
- 584 12. **Campia U, Choucair WK, Bryant MB, Waclawiw MA, Cardillo C, and Panza JA.**  
585 Reduced endothelium-dependent and-independent dilation of conductance arteries in African  
586 Americans. *Journal of the American College of Cardiology* 40: 754-760, 2002.
- 587 13. **Patik JC, Curtis BM, Nasirian A, Vranish JR, Fadel PJ, and Brothers RM.** Sex  
588 differences in the mechanisms mediating blunted cutaneous microvascular function in young  
589 black men and women. *American Journal of Physiology-Heart and Circulatory Physiology* 2018.
- 590 14. **Hurr C, Kim K, Harrison ML, and Brothers RM.** Attenuated cerebral vasodilatory  
591 capacity in response to hypercapnia in college-aged African Americans. *Exp Physiol* 100: 35-43,  
592 2015.
- 593 15. **Gokce N, Holbrook M, Duffy SJ, Demissie S, Cupples LA, Biegelsen E, Keaney JF,  
594 Jr., Loscalzo J, and Vita JA.** Effects of race and hypertension on flow-mediated and  
595 nitroglycerin-mediated dilation of the brachial artery. *Hypertension* 38: 1349-1354, 2001.
- 596 16. **Javed Z, Haisum Maqsood M, Yahya T, Amin Z, Acquah I, Valero-Elizondo J,  
597 Andrieni J, Dubey P, Jackson RK, Daffin MA, Cainzos-Achirica M, Hyder AA, and Nasir K.**  
598 Race, Racism, and Cardiovascular Health: Applying a Social Determinants of Health  
599 Framework to Racial/Ethnic Disparities in Cardiovascular Disease. *Circulation Cardiovascular  
600 quality and outcomes* 15: e007917, 2022.
- 601 17. **Mersky JP, Choi C, Plummer Lee C, and Janczewski CE.** Disparities in adverse  
602 childhood experiences by race/ethnicity, gender, and economic status: Intersectional analysis of  
603 a nationally representative sample. *Child abuse & neglect* 117: 105066, 2021.
- 604 18. **Wyatt SB, Williams DR, Calvin R, Henderson FC, Walker ER, and Winters K.**  
605 Racism and cardiovascular disease in African Americans. *Am J Med Sci* 325: 315-331, 2003.
- 606 19. **Peters RM.** Racism and hypertension among African Americans. *Western journal of  
607 nursing research* 26: 612-631, 2004.
- 608 20. **McEwen BS.** Allostasis and allostatic load: implications for neuropsychopharmacology.  
609 *Neuropsychopharmacology : official publication of the American College of  
610 Neuropsychopharmacology* 22: 108-124, 2000.
- 611 21. **Lockwood KG, Marsland AL, Matthews KA, and Gianaros PJ.** Perceived  
612 discrimination and cardiovascular health disparities: a multisystem review and health  
613 neuroscience perspective. *Ann N Y Acad Sci* 1428: 170-207, 2018.
- 614 22. **Mazer SP, and Rabbani LE.** Evidence for C-reactive protein's role in (CRP) vascular  
615 disease: atherothrombosis, immuno-regulation and CRP. *Journal of thrombosis and  
616 thrombolysis* 17: 95-105, 2004.
- 617 23. **Dinh QN, Drummond GR, Sobey CG, and Chrissobolis S.** Roles of inflammation,  
618 oxidative stress, and vascular dysfunction in hypertension. *BioMed Research International*  
619 2014: 2014.
- 620 24. **Woods-Giscombe CL, Allen AM, Black AR, Steed TC, Li Y, and Lackey C.** The  
621 Giscombe Superwoman Schema Questionnaire: Psychometric Properties and Associations with  
622 Mental Health and Health Behaviors in African American Women. *Issues in mental health  
623 nursing* 40: 672-681, 2019.
- 624 25. **James SA.** John Henryism and the health of African-Americans. *Culture, medicine and  
625 psychiatry* 18: 163-182, 1994.
- 626 26. **Clark R.** Interactive but not direct effects of perceived racism and trait anger predict  
627 resting systolic and diastolic blood pressure in black adolescents. *Health psychology : official  
628 journal of the Division of Health Psychology, American Psychological Association* 25: 580-585,  
629 2006.

- 630 27. **Williams DR, and Mohammed SA.** Discrimination and racial disparities in health:  
631 evidence and needed research. *Journal of behavioral medicine* 32: 20-47, 2009.
- 632 28. **Clark R, and Gochett P.** Interactive effects of perceived racism and coping responses  
633 predict a school-based assessment of blood pressure in black youth. *Annals of behavioral*  
634 *medicine : a publication of the Society of Behavioral Medicine* 32: 1-9, 2006.
- 635 29. **Cavanagh L, and Obasi EM.** The Moderating Role of Coping Style on Chronic Stress  
636 Exposure and Cardiovascular Reactivity Among African American Emerging Adults. *Prevention*  
637 *science : the official journal of the Society for Prevention Research* 22: 357-366, 2021.
- 638 30. **Nandadeva D, Young BE, Stephens BY, Grotle AK, Skow RJ, Middleton AJ,**  
639 **Haseltine FP, and Fadel PJ.** Blunted peripheral but not cerebral vasodilator function in young  
640 otherwise healthy adults with persistent symptoms following COVID-19. *Am J Physiol Heart Circ*  
641 *Physiol* 321: H479-h484, 2021.
- 642 31. **Liguori G, and Medicine ACS.** *ACSM's Guidelines for Exercise Testing and*  
643 *Prescription.* Wolters Kluwer Health, 2020.
- 644 32. **Craig CL, Marshall AL, Sjöström M, Bauman AE, Booth ML, Ainsworth BE, Pratt M,**  
645 **Ekelund U, Yngve A, Sallis JF, and Oja P.** International physical activity questionnaire: 12-  
646 country reliability and validity. *Med Sci Sports Exerc* 35: 1381-1395, 2003.
- 647 33. **Curtis DS, Fuller-Rowell TE, Doan SN, Zgierska AE, and Ryff CD.** Racial and  
648 socioeconomic disparities in body mass index among college students: understanding the role  
649 of early life adversity. *Journal of behavioral medicine* 39: 866-875, 2016.
- 650 34. **Ferraro KF, Schafer MH, and Wilkinson LR.** Childhood Disadvantage and Health  
651 Problems in Middle and Later Life: Early Imprints on Physical Health? *American sociological*  
652 *review* 81: 107-133, 2016.
- 653 35. **Brindle RC, Pearson A, and Ginty AT.** Adverse childhood experiences (ACEs) relate  
654 to blunted cardiovascular and cortisol reactivity to acute laboratory stress: A systematic review  
655 and meta-analysis. *Neuroscience and biobehavioral reviews* 134: 104530, 2022.
- 656 36. **Hughes K, Bellis MA, Hardcastle KA, Sethi D, Butchart A, Mikton C, Jones L, and**  
657 **Dunne MP.** The effect of multiple adverse childhood experiences on health: a systematic review  
658 and meta-analysis. *The Lancet Public health* 2: e356-e366, 2017.
- 659 37. **Dong M, Giles WH, Felitti VJ, Dube SR, Williams JE, Chapman DP, and Anda RF.**  
660 Insights into causal pathways for ischemic heart disease: adverse childhood experiences study.  
661 *Circulation* 110: 1761-1766, 2004.
- 662 38. **Brondolo E, Kelly KP, Coakley V, Gordon T, Thompson S, Levy E, Cassells A,**  
663 **Tobin JN, Sweeney M, and Contrada RJ.** The perceived ethnic discrimination questionnaire:  
664 development and preliminary validation of a community version 1. *Journal of applied social*  
665 *psychology* 35: 335-365, 2005.
- 666 39. **James SA, Strogatz DS, Wing SB, and Ramsey DL.** Socioeconomic status, John  
667 Henryism, and hypertension in blacks and whites. *Am J Epidemiol* 126: 664-673, 1987.
- 668 40. **Woods-Giscombé CL.** Superwoman schema: African American women's views on  
669 stress, strength, and health. *Qualitative health research* 20: 668-683, 2010.
- 670 41. **Martin ZT, Olvera G, Villegas CA, Campbell JC, Akins JD, Brown KK, and Brothers**  
671 **RM.** The impact of a plant-based diet on indices of cardiovascular health in African Americans:  
672 a cross-sectional study. *Appl Physiol Nutr Metab* 47: 903-914, 2022.
- 673 42. **Thijssen DHJ, Bruno RM, van Mil A, Holder SM, Fata F, Greyling A, Zock PL,**  
674 **Taddei S, Deanfield JE, Luscher T, Green DJ, and Ghiadoni L.** Expert consensus and  
675 evidence-based recommendations for the assessment of flow-mediated dilation in humans. *Eur*  
676 *Heart J* 40: 2534-2547, 2019.
- 677 43. **Miller KB, Howery AJ, Rivera-Rivera LA, Johnson SC, Rowley HA, Wieben O, and**  
678 **Barnes JN.** Age-Related Reductions in Cerebrovascular Reactivity Using 4D Flow MRI.  
679 *Frontiers in aging neuroscience* 11: 281, 2019.

- 680 44. **Junejo RT, May S, Alsalahi S, Alali M, and Ogoh S.** Cerebrovascular carbon dioxide  
681 reactivity and flow-mediated dilation in young healthy South Asian and Caucasian European  
682 men. *318*: H756-h763, 2020.
- 683 45. **Tucker WJ, Thomas BP, Puzifferri N, Samuel TJ, Zaha VG, Lingvay I, Almandoz J,**  
684 **Wang J, Gonzales EA, Brothers RM, and Nelson MD.** Impact of bariatric surgery on cerebral  
685 vascular reactivity and cognitive function: a non-randomized pilot study. *Pilot and feasibility*  
686 *studies* 6: 21, 2020.
- 687 46. Social Determinants of Health Workgroup - Healthy People 2030 U.S. Department of  
688 Health and Human Services. [https://health.gov/healthypeople/about/workgroups/social-](https://health.gov/healthypeople/about/workgroups/social-determinants-health-workgroup)  
689 [determinants-health-workgroup](https://health.gov/healthypeople/about/workgroups/social-determinants-health-workgroup).
- 690 47. **Collins FS, Adams AB, Aklin C, Archer TK, Bernard MA, Boone E, Burklow J,**  
691 **Evans MK, Jackson S, Johnson AC, Lorsch J, Lowden MR, Nápoles AM, Ordóñez AE,**  
692 **Rivers R, Rucker V, Schwetz T, Segre JA, Tabak LA, Hooper MW, and Wolinetz C.**  
693 Affirming NIH's commitment to addressing structural racism in the biomedical research  
694 enterprise. *Cell* 184: 3075-3079, 2021.
- 695 48. **Churchwell K, Elkind MSV, Benjamin RM, Carson AP, Chang EK, Lawrence W,**  
696 **Mills A, Odom TM, Rodriguez CJ, Rodriguez F, Sanchez E, Sharrief AZ, Sims M, and**  
697 **Williams O.** Call to Action: Structural Racism as a Fundamental Driver of Health Disparities: A  
698 Presidential Advisory From the American Heart Association. *Circulation* 142: e454-e468, 2020.
- 699 49. **Deanfield JE, Halcox JP, and Rabelink TJ.** Endothelial function and dysfunction:  
700 testing and clinical relevance. *Circulation* 115: 1285-1295, 2007.
- 701 50. **Perregaux D, Chaudhuri A, Rao S, Airen A, Wilson M, Sung B-H, and Dandona P.**  
702 Brachial vascular reactivity in blacks. *Hypertension* 36: 866-871, 2000.
- 703 51. **Rosenberry R, and Nelson MD.** Reactive hyperemia: a review of methods,  
704 mechanisms, and considerations. *318*: R605-r618, 2020.
- 705 52. **Ranadive SM, Yan H, Lane AD, Kappus RM, Cook MD, Sun P, Harvey I, Ploutz-**  
706 **Synder R, Woods JA, Wilund KR, and Fernhall BO.** Aerobic Exercise Training and Arterial  
707 Changes in African Americans versus Caucasians. *Med Sci Sports Exerc* 48: 90-97, 2016.
- 708 53. **Morris AA, Patel RS, Binongo JN, Poole J, Al Mheid I, Ahmed Y, Stoyanova N,**  
709 **Vaccarino V, Din-Dzietham R, Gibbons GH, and Quyyumi A.** Racial differences in arterial  
710 stiffness and microcirculatory function between Black and White Americans. *J Am Heart Assoc*  
711 2: e002154, 2013.
- 712 54. **Ainslie PN, and Duffin J.** Integration of cerebrovascular CO<sub>2</sub> reactivity and  
713 chemoreflex control of breathing: mechanisms of regulation, measurement, and interpretation.  
714 *Am J Physiol Regul Integr Comp Physiol* 296: R1473-1495, 2009.
- 715 55. **Akins JD, Martin ZT, Patik JC, Curtis BM, Campbell JC, Olvera G, and Brothers**  
716 **RM.** Young, non-Hispanic Black men and women exhibit divergent peripheral and cerebral  
717 vascular reactivity. *Exp Physiol* 107: 450-461, 2022.
- 718 56. **Greene RA.** Estrogen and cerebral blood flow: a mechanism to explain the impact of  
719 estrogen on the incidence and treatment of Alzheimer's disease. *International journal of fertility*  
720 *and women's medicine* 45: 253-257, 2000.
- 721 57. **Krause DN, Duckles SP, and Gonzales RJ.** Local oestrogenic/androgenic balance in  
722 the cerebral vasculature. *Acta physiologica (Oxford, England)* 203: 181-186, 2011.
- 723 58. **Felix AS, Shisler R, Nolan TS, Warren BJ, Rhoades J, Barnett KS, and Williams KP.**  
724 High-Effort Coping and Cardiovascular Disease among Women: A Systematic Review of the  
725 John Henryism Hypothesis. *Journal of urban health : bulletin of the New York Academy of*  
726 *Medicine* 96: 12-22, 2019.
- 727 59. **Bild DE, Jacobs DR, Jr., Sidney S, Haskell WL, Anderssen N, and Oberman A.**  
728 Physical activity in young black and white women. The CARDIA Study. *Ann Epidemiol* 3: 636-  
729 644, 1993.



- 730 60. **Green DJ, and Smith KJ.** Effects of Exercise on Vascular Function, Structure, and  
 731 Health in Humans. *Cold Spring Harb Perspect Med* 8: 2018.  
 732 61. **Medina-Inojosa JR, Vinnakota S, Garcia M, Arciniegas Calle M, Mulvagh SL,**  
 733 **Lopez-Jimenez F, and Bhagra A.** Role of Stress and Psychosocial Determinants on Women's  
 734 Cardiovascular Risk and Disease Development. *Journal of women's health (2002)* 28: 483-489,  
 735 2019.  
 736 62. **Hill LK, and Thayer JF.** The Autonomic Nervous System and Hypertension: Ethnic  
 737 Differences and Psychosocial Factors. *Current cardiology reports* 21: 15, 2019.  
 738 63. **Perez AD, Dufault SM, Spears EC, Chae DH, Woods-Giscombe CL, and Allen AM.**  
 739 Superwoman Schema and John Henryism among African American women: An intersectional  
 740 perspective on coping with racism. *Social science & medicine (1982)* 115070, 2022.  
 741 64. **Vaccarino V, Shah AJ, Mehta PK, Pearce B, Raggi P, Bremner JD, and Quyyumi**  
 742 **AA.** Brain-heart connections in stress and cardiovascular disease: Implications for the cardiac  
 743 patient. *Atherosclerosis* 328: 74-82, 2021.  
 744 65. **Danese A, and McEwen BS.** Adverse childhood experiences, allostasis, allostatic load,  
 745 and age-related disease. *Physiol Behav* 106: 29-39, 2012.  
 746

747 **Tables**

748

**Table 1. Participant Characteristics**

|                                                    | Black Women<br>mean ± SD (n = 21) | White Women<br>mean ± SD (n = 16) | p value |
|----------------------------------------------------|-----------------------------------|-----------------------------------|---------|
| Age (years)                                        | 20 ± 2                            | 25 ± 7                            | 0.035   |
| BMI (kg/m <sup>2</sup> )                           | 24.5 ± 4.3                        | 24.8 ± 2.7                        | 0.796   |
| Waist-to-hip ratio (au)                            | 0.78 ± 0.05                       | 0.74 ± 0.05                       | 0.061   |
| Heart rate (bpm)                                   | 62 ± 7                            | 64 ± 10                           | 0.419   |
| Systolic blood pressure (mmHg)                     | 114 ± 7                           | 117 ± 6                           | 0.354   |
| Diastolic blood pressure (mmHg)                    | 73 ± 5                            | 73 ± 6                            | 0.883   |
| Physical activity (MET-min/week)                   | 3795 ± 3428                       | 3385 ± 2131                       | 0.658   |
| Time spent sitting (min/day)                       | 446 ± 149                         | 386 ± 146                         | 0.229   |
| Day of menstrual cycle (# of days)                 | 16 ± 13 (n = 20)                  | 19 ± 11 (n = 12)                  | 0.391   |
| Mother's level of formal education (au, range 1-7) | 5.7 ± 1.4                         | 5.1 ± 1.6                         | 0.296   |
| Father's level of formal education (au, range 1-7) | 5.2 ± 1.6                         | 5.1 ± 1.5 (n = 15)                | 0.960   |

749

750 **Note:** BMI, body mass index; MET, metabolic equivalent of task.

751

752

753

754

**Table 2. Venous Blood Sample Results**

|                           | Black Women<br>mean $\pm$ SD ( <i>n</i> ) | White Women<br>mean $\pm$ SD ( <i>n</i> ) | <i>p</i> value |
|---------------------------|-------------------------------------------|-------------------------------------------|----------------|
| Glucose (mg/dl)           | 82 $\pm$ 6 (19)                           | 88 $\pm$ 5 (14)                           | 0.013          |
| HbA1c (%)                 | 5.4 $\pm$ 0.3 (19)                        | 5.1 $\pm$ 0.2 (13)                        | <0.001         |
| Total Cholesterol (mg/dl) | 161 $\pm$ 26 (19)                         | 173 $\pm$ 34 (14)                         | 0.286          |
| Triglycerides (mg/dl)     | 51 $\pm$ 19 (19)                          | 86 $\pm$ 37 (14)                          | 0.005          |
| HDL-C (mg/dl)             | 64 $\pm$ 16 (19)                          | 58 $\pm$ 8 (14)                           | 0.165          |
| LDL-C (mg/dl)             | 86 $\pm$ 22 (19)                          | 99 $\pm$ 29 (14)                          | 0.202          |
| VLDL-C (mg/dl)            | 10 $\pm$ 3 (19)                           | 16 $\pm$ 6 (14)                           | 0.004          |
| Estradiol (pg/ml)         | 90 $\pm$ 82 (16)                          | 39 $\pm$ 40 (11)                          | 0.043          |
| Progesterone (ng/ml)      | 2.7 $\pm$ 3.5 (16)                        | 2.5 $\pm$ 4.9 (11)                        | 0.905          |
| C-Reactive Protein (mg/l) | 1.4 $\pm$ 1.7 (19)                        | 2.9 $\pm$ 2.7 (14)                        | 0.084          |

755

756

757

758

**Note:** HbA1c, glycated hemoglobin; HDL-C, high-density lipoprotein cholesterol; LDL-C, low-density lipoprotein cholesterol; VLDL-C, very low-density lipoprotein cholesterol.

759



760

**Table 3. Psychosocial Stress Exposure & Internalization/Coping**

|                                                     | Black Women<br>mean ± SD (n = 21) | White Women<br>mean ± SD (n = 16) | p value |
|-----------------------------------------------------|-----------------------------------|-----------------------------------|---------|
| Adverse Childhood Experiences (#, range 0-10)       | 3 ± 2                             | 3 ± 3                             | 0.389   |
| Past week perceived discrimination (au, range 0-30) | 3.7 ± 4.7                         | 1.3 ± 3.5                         | 0.022   |
| JHAC12 Score (au, range 12-60)                      | 46 ± 6                            | 48 ± 4                            | 0.289   |
| SWS-Overall (au, range 0-105)                       | 47 ± 15                           | -                                 | -       |
| SWS-Strength (au, range 0-18)                       | 11 ± 4                            | -                                 | -       |
| SWS-Succeed (au, range 0-18)                        | 12 ± 4                            | -                                 | -       |
| SWS-Emotions (au, range 0-21)                       | 12 ± 5                            | -                                 | -       |
| SWS-Vulnerable (au, range 0-21)                     | 12 ± 5                            | -                                 | -       |
| SWS-Help (au, range 0-27)                           | 12 ± 6                            | -                                 | -       |

761

762

763

764

765

766

**Note:** JHAC12, John Henryism Active Coping Scale; SWS, Superwoman Schema; Strength, Obligation to present an image of strength; Succeed, Intense motivation to succeed; Emotions, Obligation to suppress emotions; Vulnerable, Resistance to being vulnerable; Help, Obligation to help others.

767

768

769

770

771

772

773

774

775

776

777

778

779

780

Figure 1

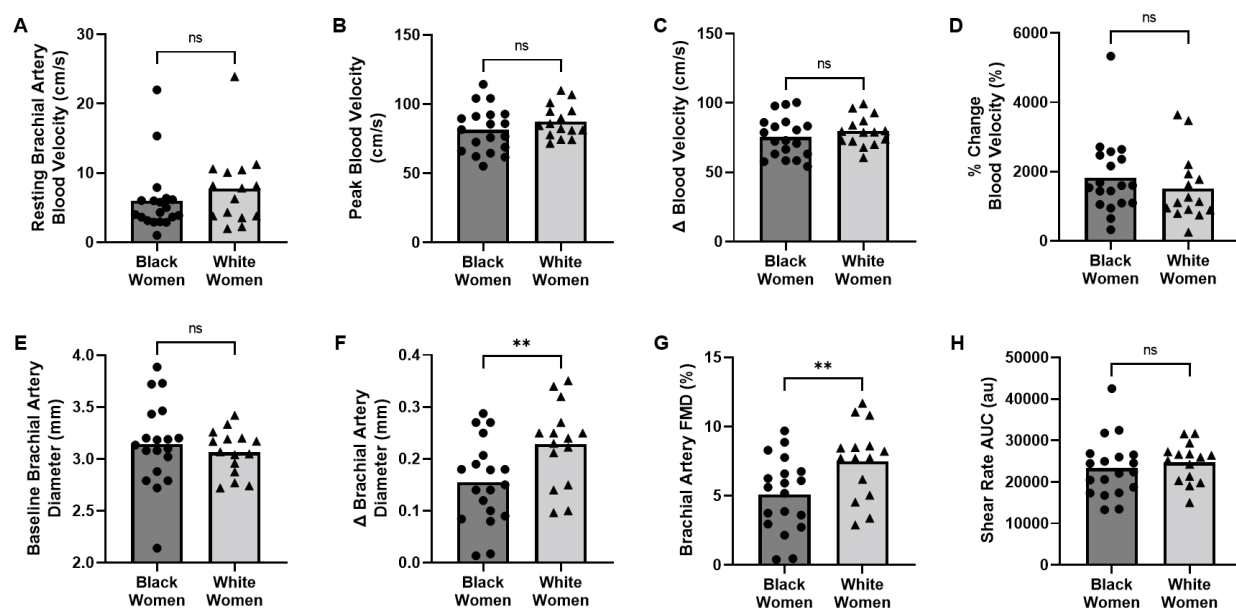

**Figure 1.** Post-occlusive forearm reactive hyperemia and brachial artery flow-mediated dilation in Black ( $n = 19$ ) and White ( $n = 15$ ) women. A) Resting brachial artery blood velocity. B) Peak brachial artery blood velocity. C) Absolute change in brachial artery blood velocity. D) Percentage change in brachial artery blood velocity. E) Baseline brachial artery diameter. F) Absolute change in brachial artery diameter. G) Percentage change in brachial artery diameter (i.e., flow-mediated dilation). H) Brachial artery shear rate area under the curve (to peak diameter, above baseline). FMD: Flow-mediated dilation. ns: not significant;  $*p < 0.05$  between groups. Data are presented individually and as group means.

Figure 2

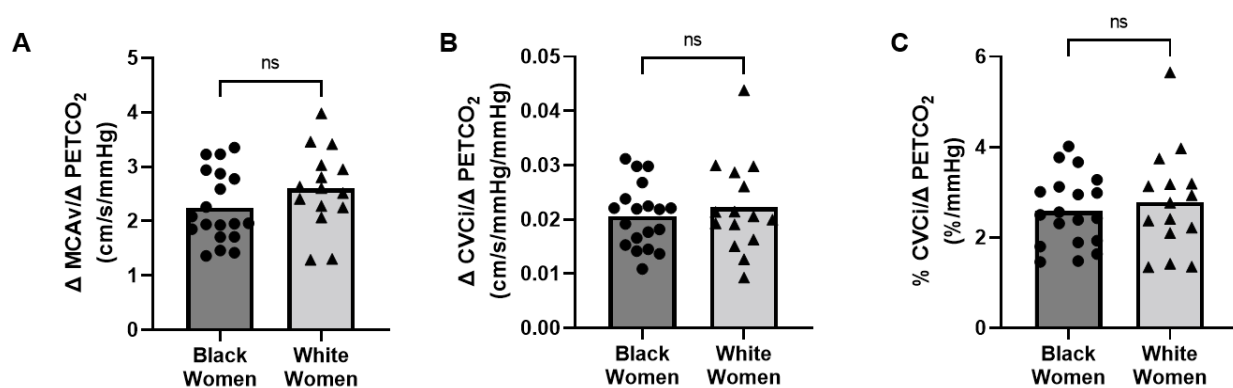

**Figure 2.** Cerebral vascular reactivity to 6% steady-state hypercapnia in Black ( $n = 19$ ) and White ( $n = 15$ ) women. A)  $\Delta \text{MCAv} / \Delta \text{PETCO}_2$ . B)  $\Delta \text{CVCi} / \Delta \text{PETCO}_2$ . C)  $\% \text{CVCi} / \Delta \text{PETCO}_2$ . MCAv, Middle cerebral artery blood velocity; PETCO<sub>2</sub>, Partial pressure of end-tidal carbon dioxide; CVCi, Cerebrovascular conductance index. ns, not significant. Data are presented individually and as group means.

Figure 3

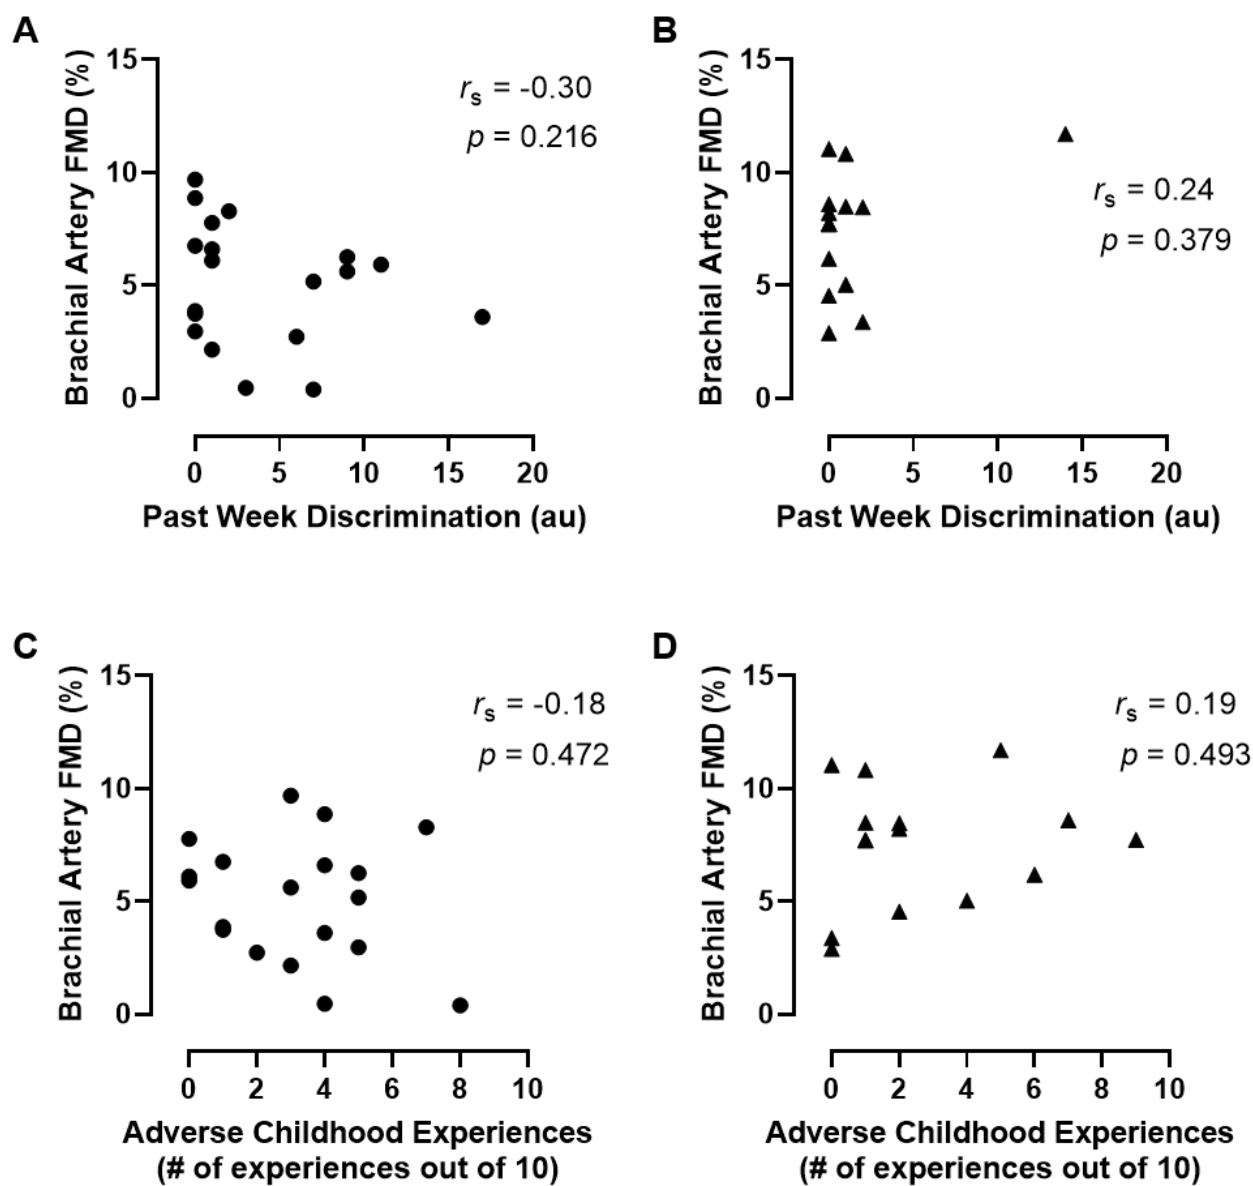

**Figure 3.** The relationship between Past Week Discrimination (A & B) & Adverse Childhood Experiences (C & D) and brachial artery FMD in Black (●,  $n = 19$ ) and White (▲,  $n = 15$ ) women. FMD, flow-mediated dilation.

Figure 4

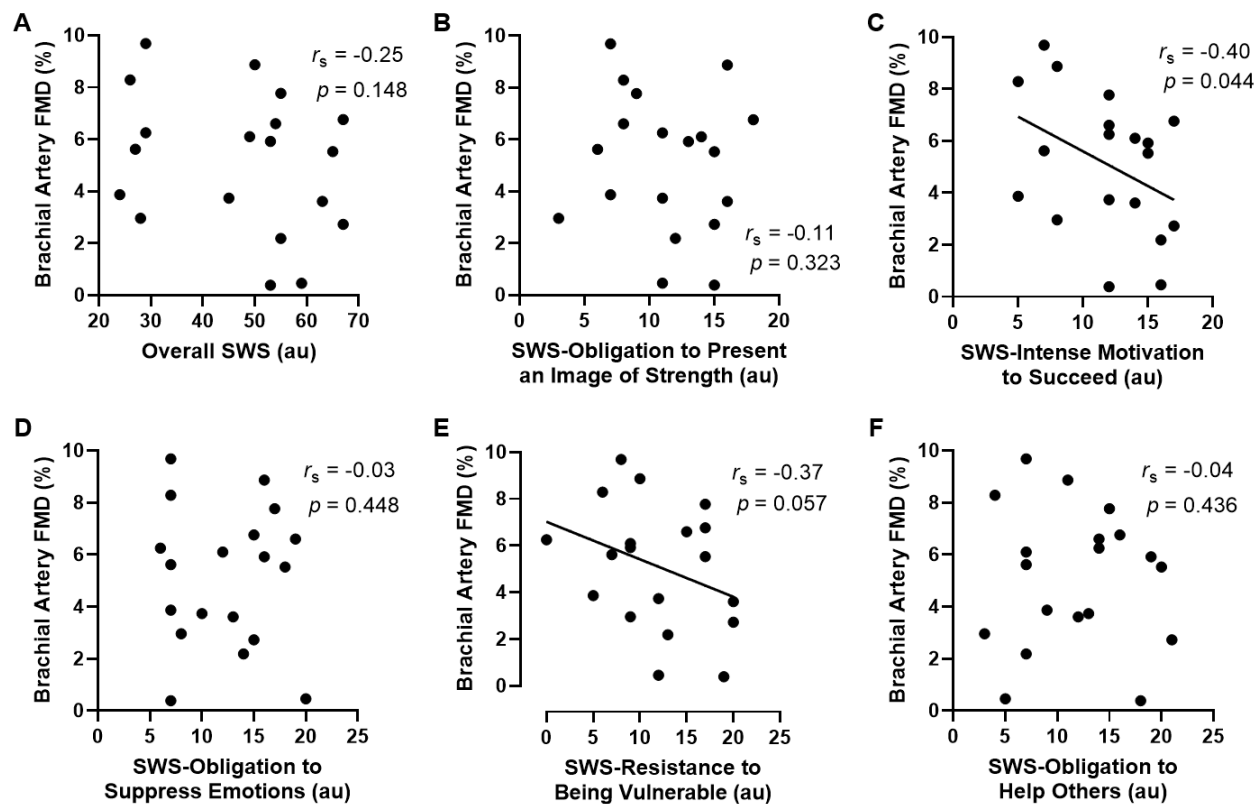

**Figure 4.** The relationship between Overall SWS (A); SWS-Obligation to Present an Image of Strength (B); SWS-Intense Motivation to Succeed (C); SWS-Obligation to Suppress Emotions (D); SWS-Resistance to Being Vulnerable (E); & SWS-Obligation to Help Others (F) and brachial artery FMD in Black women ( $n = 19$ ). SWS, Superwoman Schema; FMD, flow-mediated dilation.

Figure 5

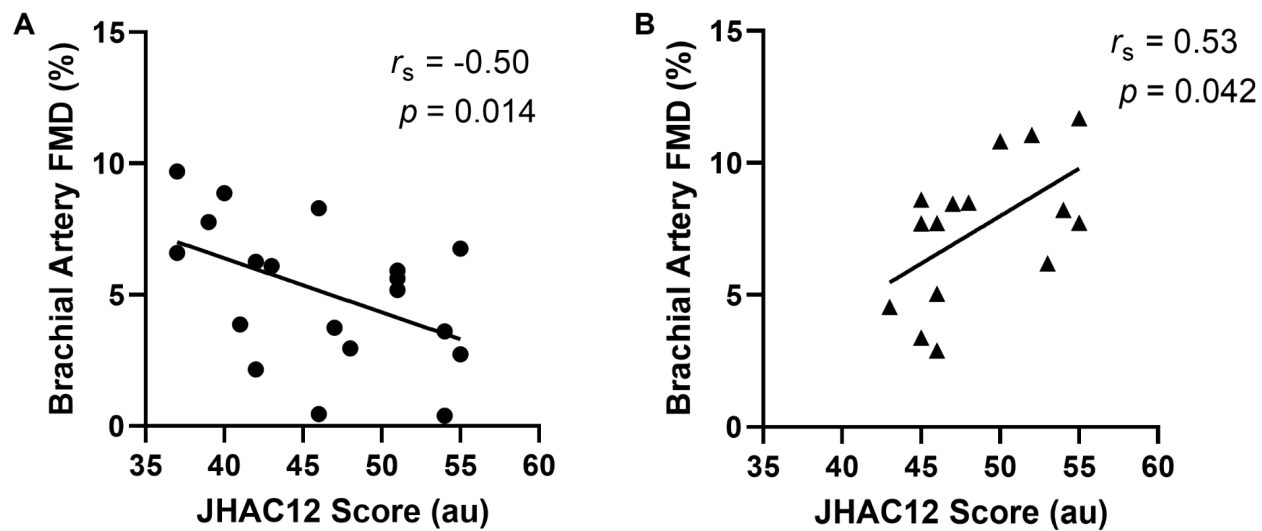

**Figure 5.** The relationship between endorsement of John Henryism and brachial artery FMD in Black (●,  $n = 19$ ) and White (▲,  $n = 15$ ) women. JHAC12, John Henryism Active Coping Scale; FMD, flow-mediated dilation.
